# Compounds enhancing human sperm motility identified using a high-throughput phenotypic screening platform

Franz S. Gruber<sup>§</sup>

Zoe C. Johnston<sup>~</sup>

Neil R. Norcross<sup>‡</sup>

Irene Georgiou<sup>‡</sup>

Caroline Wilson<sup>‡</sup>

Kevin D. Read<sup>‡</sup>

Ian H. Gilbert<sup>‡</sup>

Jason R. Swedlow<sup>§,§</sup>

Sarah Martins de Silva<sup>~</sup>

Christopher LR Barratt<sup>~</sup>

<sup>~</sup>Reproductive Medicine Research Group, Division of Systems Medicine, School of Medicine, Ninewells Hospital and Medical School, University of Dundee, Dundee, DD19SY, UK.

<sup>‡</sup>Drug Discovery Unit, Wellcome Centre for Anti-Infectives Research, Division of Biological Chemistry and Drug Discover, University of Dundee, Dundee, DD1 5EH., UK

<sup>§</sup>University of Dundee, Division of Computational Biology and Centre for Gene Regulation and Expression, School of Life Sciences  
Dundee, UK

<sup>§</sup>National Phenotypic Screening Centre, School of Life Sciences, University of Dundee, Dundee DD1 5EH

Correspondence: [c.barratt@dundee.ac.uk](mailto:c.barratt@dundee.ac.uk)

ORCID

Christopher L.R. Barratt: 0000-0003-0062-9979

Franz S. Gruber: 0000-0003-2008-8460

Zoe C. Johnston: 0000-0003-0904-7166

Caroline Wilson: 0000-0001-9940-0052

Irene Georgiou: 0000-0002-6042-9816

Neil R. Norcross: 0000-0001-8050-5217

- 36 Sarah Martins de Silva: 0000-0003-2579-4866
- 37 Jason R. Swedlow: 0000-0002-2198-1958
- 38 Ian H. Gilbert: 0000-0002-5238-1314
- 39
- 40 Running Title:
- 41 Key words: Drug discovery/Sperm motility/ high throughput screening/spermatozoa/subfertility

## Abstract

**Study question:** Can a high-throughput screening platform facilitate male fertility drug discovery?

**Summary answer:** A high-throughput screening platform identified a large number of compounds that enhanced sperm motility.

**What is known already:** Several efforts to find small molecules modulating sperm function have been performed but not using high-throughput technology.

**Study design, size, duration:** Healthy donor semen samples were used and samples were pooled (3-5 donors per pool). Primary screening was performed in singlicate; dose-response screening was performed in duplicate (independent donor pools).

**Participants/materials, setting, methods:** Spermatozoa isolated from healthy donors were prepared by density gradient centrifugation and incubated in 384-well plates with compounds (6.25 uM) to identify those compounds with enhancing effects on motility. A total of ~17,000 compounds from the following libraries: ReFRAME, Prestwick, Tocris, LOPAC, CLOUD and MMV Pathogen Box were screened. Dose response experiments of screening hits were performed to confirm the enhancing effect on sperm motility. Experiments were performed in a University setting.

**Main results and the role of chance:** From our primary single concentration screening, 105 compounds elicited an enhancing effect on sperm motility compared to DMSO treated wells. Confirmed enhancing compounds were grouped based on their annotated targets/target classes. A major target class, phosphodiesterase inhibitors, were identified in particular PDE10A inhibitors as

well as number of compounds not previously identified/known to enhance human sperm motility such as those related to GABA signaling.

**Limitations, reasons for caution:** Compounds have been tested with prepared donor spermatozoa and only incubated for a short period of time. Therefore, the effect of compounds on whole semen or with longer incubation time may be different. All experiments were performed in vitro.

**Wider implications of the findings:** This phenotypic screening assay identified a large number of compounds that increased sperm motility. In addition to furthering our understanding of human sperm function, for example identifying new avenues for discovery, we highlight potential inhibitors as promising start-point for a medicinal chemistry programme for potential enhancement of male infertility. Moreover, with disclosure of the results of screening we present a substantial resource to inform further work in the field

**Study funding/competing interest(s):** This study was supported by the Bill and Melinda Gates Foundation and Scottish Funding Council and Scottish Universities Life Science Alliance.

## Introduction

Sperm dysfunction is the single most common cause of infertility. However, there is an absence of new diagnostic tools and non-MAR (Medically Assisted Reproduction) based treatments for the sub fertile man (Barratt et al., 2017; De Jonge and Barratt, 2019). A fundamental obstacle is the relative paucity of knowledge of the production, formation, maturation and physiological functions of both the normal and dysfunctional spermatozoon. There is an urgent need to address this knowledge gap to formulate appropriate diagnostic assays, develop rational therapies and understand how external

factors, such as the environment influence these processes (Barratt et al., 2021).

Although some progress has been made in our understanding of the workings of the mature spermatozoon using tools such as proteomics, electrophysiology and imaging, one area in which there has been minimal progress is the development of an effective high-throughput screening System (HTS) using motile human spermatozoa (Martins da Silva et al., 2017). Current methods for assessment of sperm quality are time-consuming and inappropriate for high-throughput drug discovery (Schiffer et al., 2014; Tardif et al., 2014) . One way around this has been to utilize HTS assays with surrogate measures of sperm function such as intracellular calcium concentration  $[Ca^{2+}]_i$  (Martins da Silva et al., 2017; Schiffer et al., 2014). Though informative, these do not directly assess cell function and have key limitations. For example, if  $[Ca^{2+}]_i$  is used as a surrogate of sperm motility, a number of compounds generate an increase in  $[Ca^{2+}]_i$  but have no significant effect on motility (Martins da Silva et al., 2017; McBrinn et al., 2019). To provide a transformative leap in understanding a HTS system for the assessment of quantitative motility is necessary. Recently, a phenotypic platform has been developed which examined human sperm motility in a high throughput manner (Gruber et al., 2020).

Although this HTS system has been used to identify potential compounds for male contraception, i.e. those having a negative effect on human sperm function, it can conversely be used to uncover elements of sperm cell biology and function, and to identify compounds that enhance sperm function. For example, it allows for large scale screening of not only approved drugs, target-class specific libraries (such as ion channels, kinase inhibitors), but also large libraries of chemically-diverse lead-like small molecules that could provide the start-point for medicinal chemistry. In this study, we utilized this HTS system to examine six libraries incorporating ~17,000 compounds with the dual aim of furthering our understanding of human sperm function and, generating possible

116 start points for a medicinal chemistry programme for potential enhancement of male infertility.

117

118

## 119 Materials and Methods

120

### 121 Experimental design:

122 We used a HTS screening platform to assess the motility of live human spermatozoa. The platform  
123 and its development are described in detail in Gruber et al., 2020, and summarised below in brief.  
124 The platform was used to screen six compound libraries for their enhancing effects on motility.  
125 Whilst we have developed a screening module for detection of the Acrosome Reaction using flow  
126 cytometry (Gruber et al., 2020), this was not examined in this study in order to increase throughput  
127 and focus on compounds affecting motility. The HTS system and experimental design are illustrated  
128 in Figure 1.

129

### 130 Selection and preparation of spermatozoa.

131 Semen samples were obtained from volunteer donors. Written consent was obtained from each  
132 donor in accordance with the Human Fertilization and Embryology Authority (HFEA) Code of Practice  
133 (version 8) under local ethical approval (13/ES/0091) from the Tayside Committee of Medical  
134 Research Ethics B.  
135 Donors had no known fertility problems and normal sperm concentration, motility and semen  
136 characteristics according to WHO criteria (2010). Samples were obtained by masturbation, after  
137 sexual abstinence of 2-5 days, and delivered to the research laboratory within one hour of  
138 production. Samples were allowed to liquify at 37°C for 15 to 30 minutes prior to preparation by  
139 discontinuous density gradient centrifugation (DGC). Gradients were prepared using 80% and 40%

Percoll (Sigma Aldrich, UK) diluted with non-capacitation media (Minimal Essential Medium Eagle Sigma M3024, supplemented with HEPES, Sodium lactate, and Sodium pyruvate to achieve concentrations previously described (Tardif et al., 2014). For initial screening, prepared donor spermatozoa were routinely pooled to create screening batches of 3-5 donors to reduce donor-to-donor variability. After preparation by DGC and pooling into screening batches, cells were incubated for 3 hours at 37°C under non-capacitating conditions.

### The High-Throughput Screening System.

Full details of the HTS system, and its development, are discussed by Gruber and colleagues (Gruber et al., 2020). In brief, screening batches of cells were transferred to a robotic platform (HighRes Biosolutions Inc.) and maintained during the screen at 37°C. Assay-ready 384-well plates, containing compounds were prepared prior to the screen, and filled with approximately 10,000 spermatozoa (20 µL) per well using a liquid handling system (MultiDrop Combi; ThermoFisher). These plates were incubated for 10 minutes prior to imaging. The HTS system utilised a Yokogawa CV7000 Cell Voyager high-throughput microscope to record time-lapse images from 2 positions in each well. An adaptation of a tracking algorithm, Trackpy v0.4.1 (Allan et al., 2018) was utilised to track individual spermatozoa within each well and obtain kinematic parameters. Within the compound-test plates, DMSO was used as the vehicle control.

### Libraries screened.

1. The Pathogen box (Medicines for Malaria Venture [MMV] generously provided by MMV, <https://www.mmv.org/mmv-open/pathogen-box/about-pathogen-box.> ). This is a small repurposing library assembled to screen against rare and neglected tropical diseases containing ~400 diverse, drug-like molecules with demonstrated biological activity against different pathogens.

2. The CeMM Library of Unique Drugs (CLOUD) purchased from Enamine (<https://enamine.net/hit-finding/compound-collections/bioreference-compounds/the-comprehensive-drug-collection-cloud>) is a set of 263 small molecules representing the target and chemical space of FDA-approved drugs that has been used for drug repurposing.
3. Tocris compound library: (Tocris, Bristol, United Kingdom, [https://www.tocris.com/products/tocriscreen-plus\\_5840](https://www.tocris.com/products/tocriscreen-plus_5840).) comprising 1280 biologically active small molecule compounds.
4. LOPAC®1280 LOPAC (Library of Pharmacologically Active Compounds <https://www.sigmaaldrich.com/life-science/cell-biology/bioactive-small-molecules/lopac1280-navigator.html>). These compose a biologically annotated collection of inhibitors, receptor ligands, pharma-developed tools, and approved drugs which impacts many signalling pathways and covers all major drug target classes (1280 compounds).
5. Prestwick Chemical Library: (<http://www.prestwickchemical.com/libraries-screening-lib-pcl.html>) Comprising 1280 off patent drugs with high chemical and pharmacological diversity as well as known bioavailability and safety in humans (1280 compounds).
6. ReFRAME (Repurposing, Focused Rescue, and Accelerated Medchem). The initial library consists of ~ 12,000 approved drugs, in-development small molecules and bio-active compounds and was constructed as a library for potential drug repurposing (Janes et al., 2018). The advantages of using this library was the potential to identify chemical compounds that are already approved for other indications or having undergone (or currently undergoing) clinical trials or had IND approval – hence potentially accelerating progress towards a safe and effective enhancer of motility. Calibr kindly provided up to 1% of hits for subsequent dose response experiments. Only structures of confirmed hits were unblinded. We have also received a further 950 cpds, which have been added at a later stage to the ReFRAME collection.



190

## 191 Data normalization and hit confirmation

192 All steps were performed as previously described (Gruber et al., 2020). In summary, data from every  
193 compound well was normalized to those from in-plate DMSO controls (wells containing the same  
194 amount of DMSO as compound wells). Two positions were recorded in every well and the average  
195 of those positions was used for calculating % of control = (VCL median/DMSO median ) x 100, where  
196 VCL median is the median of all sperm tracks in each well (immotile, non-progressively motile,  
197 progressively motile) and DMSO median is the median of all 16 DMSO control wells on the  
198 corresponding plate. Hits from the primary screening were chosen based on % change compared to  
199 the control: 20% (LOPAC, CLOUD, Tocris, Prestwick, ReFRAME last batch); 40% (ReFRAME first batch,  
200 MMV Pathogenbox).

201

202 Hit compounds were examined in subsequent dose response experiments using different donor  
203 sample pools (comprising 3 different biological replicates). A compound was only identified as  
204 having a positive effect if it was confirmed in these dose response experiments. Dose response  
205 curves (DRC) consisting of a series of 8-points with 3-fold dilution (with 10 µM top concentration)  
206 were fitted using the DR4PL (4 parameter logistic fit) package in R from which EC<sub>50</sub> (half-maximum  
207 effective concentration of x % effect) was estimated.

208

## 209 Hit analysis

210 Chemical space was visualized by generating Morgan fingerprints using RDKit (radius = 2, bits =  
211 2048) and UMAP (McInnes et al., 2018). Physico-chemical properties were calculated using RDKit  
212 (<http://www.rdkit.org>) and KNIME (Berthold M.R. et al., 2008).

## Results

In order to find compounds that positively enhance sperm motility, we used a HTS platform (Figure 1A), to screen ~17,000 compounds comprising a variety of small molecule libraries (Figure 1B). Primary hits were identified based on percentage effect relative to DMSO control. These limits varied among the libraries (Table 1) and a hit selection criterion of 20% increase in motility (i.e. 120% of control) gave a primary hit rate of between 0.3-1.9% and several chemical start points for further investigations. Primary hit compounds were confirmed in subsequent dose response experiments (two biological replicates, performed on two different days) and, in total 105 compounds were identified as confirmed hits (Supplementary Table 1), with moderate to high motility enhancing activity (>20-40% increase in sperm motility) (Table 1, Figure 2A). In general, motility enhancing compounds increased the fraction of progressively motile cells (Figure 2B-C). The confirmed hits were annotated (broad definitions based on vendor annotations) to affect a variety of protein target classes (Figure 3A, Supplement Table 1).

Some compounds could not be assigned to a clear target class, however, of the annotated compounds, protein kinase and phosphodiesterase were the most common target classes (Figure 3A). Another prominent target class were receptor modulators (inhibitor, agonist, antagonist), some of which are related to GABA signalling (Figure 3A, Figure 3C panel 1, Supplementary Table 1).

The most potent hits had sub-micromolar potency and substantial effects on motility (up to 190% compared to DMSO controls Table 2). Chemical space visualization (Figure 3B) reveals that several confirmed hits have similar or identical structures (Figure 3C). The small molecule libraries used had some overlapping compounds and a number of these were either consistently active (e.g. SCH 58261, Torin2 (Figure 3C panel 2), or Ethaverine) or consistently inactive (e.g. Rolipram, Milrinone or Sildenafil). A small number of compounds, for example Papaverine, were active in one library but

238 not others. This may be due to the concentration at which they have an effect and/or inconsistencies  
 239 with the library material such as purity/quality of compounds.  
 240  
 241 One prominent target class of confirmed hits were phosphodiesterase (PDE) inhibitors (Table 2,  
 242 Figure 3A, Figure 4A). Some of those are well described such as Trequinsin or Papaverine as  
 243 influencing motility but for others, such as TAK-063, JNJ-42396302, RG-7203 and PF-2545920 (Figure  
 244 4B) no data was available. The latter four compounds have an annotation of PDE10A inhibition  
 245 (Table 3) and showed sub micromolar responses (0.04 – 0.49  $\mu$ M) in dose response experiments yet  
 246 some are structurally distinct (Figure 4B). All annotated PDE10A inhibitors used in this study had a  
 247 enhancing effect on motility. For all four PDE10A inhibitors a similar shift of VCL relative to DMSO  
 248 controls was observed (Figure 4C). Another interesting observation among PDE inhibitors is that, at  
 249 6 $\mu$ M, we did not detect any enhancing effect of compounds belonging to the methylxanthine class  
 250 e.g. IBMX or Pentoxifylline. All annotated PDE inhibitors used in this study are summarized in  
 251 Supplementary table 2.  
 252

## Discussion

The current study utilised a validated imaging-based screening platform that measures fundamental aspects of human sperm behaviour (Gruber et al., 2020) to screen a collection of chemical libraries comprising ~17,000 approved drugs, clinically-tested compounds and annotated chemical tool compounds for their potential to enhance motility. The aim was to further our understanding of human sperm function and generate possible start points for a medicinal chemistry programme for potential enhancement of male infertility.

There are significant challenges in producing a suitable platform for HTS of mature human spermatozoa (see(Gruber et al., 2020) and development is always a balance between achieving the necessary high throughput and a detailed assessment of each compound. In these experiments initial screening was performed under non capacitating conditions at one concentration (6 $\mu$ M) with compounds being assessed after only a relatively short incubation (10-27 mins). The data will therefore primarily reflect the use of these conditions and its possible that other permutations, for example, screening under capacitating conditions or longer incubation times may generate different results. In the current study when a primary hit was identified, dose response experiments using different pools of donor cells were undertaken to confirm the hit and provide initial information on potential activity. Although this approach provides information about the activity of the compound, further experiments are necessary to provide a more comprehensive picture of each compound's activity and assess their mechanisms of action and suitability for further development (see (McBrinn et al., 2019) for examples of such investigations).

The screening platform is complementary to a reductionist approach. Identification of several PDE inhibitors as confirmed hits in dose response experiments (discussed below) provide evidence of the robustness of the HTS platform. Several phosphodiesterase inhibitors (PDEi) (e.g. ibudilast,

278 trequinsin hydrochloride, and papaverine) have previously been shown to significantly increase  
 279 human sperm motility, confirming the ability of the HTS platform to identify compounds which are  
 280 effective at or below concentrations of 6µM. Furthermore, identical, or related compounds which  
 281 were present in two or more libraries were identified. For example, ibudilast was present and  
 282 detected as a hit in both the LOPAC and TOCRIS libraries, and Trequinsin hydrochloride was  
 283 confirmed in the ReFRAME and TOCRIS libraries. Another example is Torin2, a small molecule mTOR  
 284 inhibitor, which was also detected in two libraries (LOPAC and TOCRIS) along with a structurally  
 285 related compound (LY-3023414, see Figure 3C panel 2) another compound with annotated activity  
 286 against mTOR. This is intriguing as it has been recently described that in older men mTORC1 is  
 287 inhibited in highly motile spermatozoa compared to their defective/immotile counterparts (Silva et  
 288 al., 2019). For the largest library screened, the ReFRAME set, only 1% of the hits were un-blinded,  
 289 limiting our ability to analyse less active and inactive compounds from this set.

290

291 Of the target classes identified, PDE inhibitors (PDEi) account for 18/105 of the compounds found  
 292 to increase sperm motility. This is not surprising and several of the PDEi hits have been previously  
 293 identified to increase human sperm motility e.g. Dipyrimadole, Ibudilast, and Papaverine(Tardif et  
 294 al., 2014). Another potent confirmed hit, trequinsin hydrochloride, has been extensively examined  
 295 by McBrinn who described the compound's effects on human sperm motility and function (McBrinn  
 296 et al., 2019). Strikingly, a proportion of the PDEi hit compounds are annotated as specific to PDE10A.  
 297 Although relatively little has been published on the effects of PDE10A inhibitors on human sperm,  
 298 the presence of the active PDE10A enzyme has been confirmed (Marechal et al., 2017). Papaverine,  
 299 one of our PDE10A inhibitor hit compounds, was one of the specific PDE10A inhibitors have  
 300 previously been used at high concentrations to mimic the effects of capacitation and increase the  
 301 progesterone induced calcium response (Torres-Flores et al., 2008). Marechal and colleagues also  
 302 confirm their findings in additional experiments with the newly available PDE10A inhibitor MP-10

303 (Marechal et al., 2017). MP-10, also known as Mardepodect or PF-2545920, was a hit in our screen  
 304 (Supplementary Table 2). Little information is available for the other PDE10A inhibitors. TAK-063  
 305 has gained interest as a potential therapeutic drug in the treatment of schizophrenia (Suzuki and  
 306 Kimura, 2018) and is the subject of clinical trials. While JNJ-42396302 has undergone phase 1 clinical  
 307 trials, it has, to our knowledge not been previously tested on spermatozoa. The high representation  
 308 of PDE10A inhibitors in this screen, combined with their apparent potency, could indicate their  
 309 potential for further investigations for use in infertility treatment and or MAR.

310

311 Several PDE inhibitors which have been well documented for their effects on motility parameters of  
 312 human sperm, including pentoxifylline did not appear as a hit in this screen. Pentoxifylline belongs  
 313 to the methylxanthine class of drugs which includes aminophylline, theophylline, pentoxifylline,  
 314 caffeine, and 3-Isobutyl-1-methylxanthine (IBMX). Although all of these drugs were screened, none  
 315 increased sperm motility above the selection threshold. While this might initially be surprising, it is  
 316 worth noting that initial screening conditions were at 6  $\mu$ M for 10-27 minute incubation and the  
 317 actions of these drugs may require higher doses and/or longer incubation time. IBMX, for example,  
 318 is used at concentrations from 30  $\mu$ M to 1 mM (Lefievre et al., 2000; Marechal et al., 2017; Pons-  
 319 Rejraji et al., 2011; Tardif et al., 2014). Similarly, pentoxifylline has been used at 3 to 4 mM (Burger  
 320 et al., 2000; Patrizio et al., 2000; Terriou et al., 2000; Tesarik et al., 1992) although conflicting reports  
 321 have found no improvement in human sperm motility at the same concentrations (Mathieu et al.,  
 322 1994; Tournaye et al., 1994) and higher concentrations of 10mM have been used to examine its  
 323 effects on spermatozoa DNA damage (Banihani et al., 2018). Other such PDE inhibiting compounds  
 324 included Milrinone, a PDE3 inhibitor shown to effect human spermatozoa motility at 50  $\mu$ M (Lefièvre  
 325 et al., 2002), and rolipram, a PDE4 inhibitor with effects at 10  $\mu$ M (Marechal et al., 2017). Sildenafil  
 326 and its analog Vardenafil were also screened without appearing as a hit. The cGMP specific PDE5 is  
 327 expressed at low levels in human spermatozoa (Lefièvre et al., 2002) and its inhibition, in vitro, using

328 sildenafil can improve sperm motility. However, conflicting literature has reported that this effect  
329 requires vastly different concentrations of the drug. Lefièvre *et al* report that an increase in  
330 progressive motility required concentrations of at least 100µM, while Glenn et al report an  
331 improvement in progressive motility with just 0.67 µM (Glenn et al., 2007; Lefievre et al., 2000).

332

333 A substantial advantage of phenotypic screening is that it potentially opens new avenues for  
334 investigation allowing discovery of new avenues to improve our understanding of cell. In this screen,  
335 in addition to those addressed above, there are several examples that warrant further investigation.  
336 For instance, enhancement of sperm motility by Linsitinib which selectively inhibits IGF-1R and the  
337 insulin receptor, is in keeping with the recent data of insulin modulating human sperm survival  
338 (Aitken et al., 2021). Another novel consistent finding was that modulation of γ-Aminobutyric acid  
339 – GABA- resulted in an increase in sperm motility (Supplementary table 1). While there is significant  
340 literature on the role of GABA in induction of the acrosome reaction there is surprisingly little  
341 relating to human sperm motility. In the current data GABAα2/α3 agonist and NS11394 (a  
342 GABA<sub>A</sub> receptor modulator) significantly increased sperm motility. Both are selective positive  
343 allosteric modulators of GABA<sub>A</sub>Rs albeit working on different GABA<sub>A</sub> receptor subtypes. Usually they  
344 are inert in the absence of GABA or equivalent agonist. Moreover, TP003 and U90042, also GABA<sub>A</sub>  
345 receptor agonists were identified. As for the examination of the insulin receptor pathways more  
346 detailed experiments are required but modulation of GABA and associated receptor complexes will  
347 uncover as yet undetermined biology related to human sperm motility.

348

349 In summary, using a novel HTS, we identified a large number of compounds that increased sperm  
350 motility. In addition to furthering our understanding of human sperm function, for example  
351 identifying new avenues for discovery such as the role of GABA in sperm motility, we highlighted

352 PDE10A inhibitors as promising start-point for a medicinal chemistry programme for potential  
353 enhancement of male infertility. Moreover, with full disclosure of the results of screening we  
354 present a detailed resource to inform further work in the field (Supplementary table 1)

355

356



### Authors' roles

FSG performed the sperm preparation, HTS screening, processing of the data. FSG, ZCJ and CLRB analysed and interpreted the data. SMDS, IHG and KDR designed the study, assisted with interpretation of the data and original obtained funding. All authors contributed to the construction, writing, and analysis of data. All authors approved the final manuscript.

### Acknowledgements

We are very grateful to all members of the research team for their invaluable assistance. We also want to thank all the volunteer sperm donors who took part in this study and members of the research group for recruitment. We want to thank Dr David Mortimer and Dr Sharon Mortimer for their helpful insights into comparisons with the CASA system. Thanks go to Dr Steve Publicover for critical reading of the manuscript. Thanks are also due to NPSC lab members for help, particularly John Raynor for engineering support. We thank Mitch Hull, Emily Chen and Kelli Kunen at CALIBR for their help in library plating, logistics and supply of ReFRAME data. We would also like to thank Medicines for Malaria Venture (MMV) for providing pathogenbox reagents.

### Funding

Funding was provided by Bill and Melinda Gates Foundation (INV-007117). NPSC was established with funding from the Scottish Funding Council and Scottish Universities Life Science Alliance.

### Conflict of interest

CLRB is Editor for RBMO. CLRB receives funding from Chief Scientists Office (Scotland), ESHRE and Genus PLC. No other authors declared a COI.

### Availability of data

The data underlying this article are available in the article and in its online supplementary material.

384

# References

- 385 Aitken, R.J., Curry, B.J., Shokri, S., Pujiato, D.A., Gavriliouk, D., Gibb, Z., Whiting, S., Connaughton, H.S.,  
386 Nixon, B., Salamonsen, L.A., *et al.* (2021). Evidence that extrapancreatic insulin production is involved in the  
387 mediation of sperm survival. *Mol Cell Endocrinol* 526, 111193.
- 388 Allan, D.B., Caswell, T., Keim, N.C., and van der Wel, C.M. (2018). Trackpy v0.4.1.
- 389 Banihani, S.A., Abu-Alhayjaa, R.F., Amarín, Z.O., and Alzoubi, K.H. (2018). Pentoxifylline increases the level of  
390 nitric oxide produced by human spermatozoa. *Andrologia* 50.
- 391 Barratt, C.L.R., Björndahl, L., De Jonge, C.J., Lamb, D.J., Osorio Martini, F., McLachlan, R., Oates, R.D., van der  
392 Poel, S., St John, B., Sigman, M., *et al.* (2017). The diagnosis of male infertility: an analysis of the evidence to  
393 support the development of global WHO guidance-challenges and future research opportunities. *Hum*  
394 *Reprod Update* 23, 660-680.
- 395 Barratt, C.L.R., De Jonge, C.J., Anderson, R.A., Eisenberg, M.L., Garrido, N., Rautakallio Hokkanen, S., Krausz,  
396 C., Kimmins, S., O'Bryan, M.K., Pacey, A.A., *et al.* (2021). A global approach to addressing the policy, research  
397 and social challenges of male reproductive health. *Human reproduction open* 2021, hoab009.
- 398 Berthold M.R. et al. (2008). KNIME: The Konstanz Information Miner. In *Data Analysis, Machine Learning and*  
399 *Applications Studies in Classification, Data Analysis, and Knowledge Organization*, C. Preisach, H. Burkhardt,  
400 L. Schmidt-Thieme, and R. Decker, eds. (Berlin, Heidelberg: Springer).
- 401 Burger, M., Sikka, S., Bivalacqua, T., LambW, D., and Hellstrom, W. (2000). The effect of sildenafil on human  
402 sperm motion and function from normal and infertile men. *International Journal of Impotence Research* 12,  
403 229-234.
- 404 De Jonge, C., and Barratt, C.L.R. (2019). The present crisis in male reproductive health: an urgent need for a  
405 political, social, and research roadmap. *Andrology* 7, 762-768.
- 406 Glenn, D.R.J., McVicar, C.M., McClure, N., and Lewis, S.E.M. (2007). Sildenafil citrate improves sperm motility  
407 but causes a premature acrosome reaction in vitro. *Fertility and Sterility* 87, 1064-1070.
- 408 Gruber, F.S., Johnston, Z.C., Barratt, C.L.R., and Andrews, P.D. (2020). A phenotypic screening platform  
409 utilising human spermatozoa identifies compounds with contraceptive activity. *eLife* 9, e51739.
- 410 Lefièvre, L., de Lamirande, E., and Gagnon, C. (2002). Presence of Cyclic Nucleotide Phosphodiesterases  
411 PDE1A, Existing as a Stable Complex with Calmodulin, and PDE3A in Human Spermatozoa1. *Biology of*  
412 *Reproduction* 67, 423-430.
- 413 Lefievre, L., Lamirande, E.D., and Gagnon, C. (2000). The Cyclic GMP-Specific Phosphodiesterase Inhibitor,  
414 Sildenafil, Stimulates Human Sperm Motility and Capacitation but Not Acrosome Reaction. *Journal of*  
415 *Andrology* 21.
- 416 Marechal, L., Guillemette, C., Goupil, S., Blondin, P., Leclerc, P., and Richard, F.J. (2017). Cyclic nucleotide  
417 phosphodiesterases in human spermatozoa and seminal fluid: Presence of an active PDE10A in human  
418 spermatozoa. *Biochim Biophys Acta Gen Subj* 1861, 147-156.

419 Martins da Silva, S.J., Brown, S.G., Sutton, K., King, L.V., Ruso, H., Gray, D.W., Wyatt, P.G., Kelly, M.C., Barratt,  
420 C.L.R., and Hope, A.G. (2017). Drug discovery for male subfertility using high-throughput screening: a new  
421 approach to an unsolved problem. *Hum Reprod* 32, 974-984.

422 Mathieu, C., Ecochard, R., Lornage, J., Cordonier, H., and Guérin, J.F. (1994). Variability of the response to  
423 pentoxifylline in vitro in infertile normozoospermic and asthenozoospermic patients. *Archives of andrology*  
424 33, 39-49.

425 McBrinn, R.C., Fraser, J., Hope, A.G., Gray, D.W., Barratt, C.L.R., Martins da Silva, S.J., and Brown, S.G. (2019).  
426 Novel pharmacological actions of trequinsin hydrochloride improve human sperm cell motility and function.  
427 *Br J Pharmacol* 176, 4521-4536.

428 McInnes, L., Healy, J., and Melville, J. (2018). UMAP: Uniform Manifold Approximation and Projection for  
429 Dimension Reduction. *ArXiv e-prints* 1802.03426.

430 Patrizio, P., Liu, Y., Sonek, G.J., Berns, M.W., and Tadir, Y. (2000). Effect of pentoxifylline on the intrinsic  
431 swimming forces of human sperm assessed by optical tweezers. *Journal of andrology* 21, 753-756.

432 Pons-Rejraji, H., Artonne, C., Sion, B., Brugnon, F., Canis, M., Janny, L., and Grizard, G. (2011). Prostatomes:  
433 inhibitors of capacitation and modulators of cellular signalling in human sperm. *International journal of*  
434 *andrology* 34, 568-580.

435 Schiffer, C., Müller, A., Egeberg, D.L., Alvarez, L., Brenker, C., Rehfeld, A., Frederiksen, H., Wäschle, B., Kaupp,  
436 U.B., Balbach, M., *et al.* (2014). Direct action of endocrine disrupting chemicals on human sperm. *EMBO*  
437 *reports* 15, 758-765.

438 Silva, J.V., Cabral, M., Correia, B.R., Carvalho, P., Sousa, M., Oliveira, P.F., and Fardilha, M. (2019). mTOR  
439 Signaling Pathway Regulates Sperm Quality in Older Men. *Cells* 8, 629.

440 Suzuki, K., and Kimura, H. (2018). TAK-063, a novel PDE10A inhibitor with balanced activation of direct and  
441 indirect pathways, provides a unique opportunity for the treatment of schizophrenia. *CNS neuroscience &*  
442 *therapeutics* 24, 604-614.

443 Tardif, S., Madamidola, O.A., Brown, S.G., Frame, L., Lefievre, L., Wyatt, P.G., Barratt, C.L., and Martins Da  
444 Silva, S.J. (2014). Clinically relevant enhancement of human sperm motility using compounds with reported  
445 phosphodiesterase inhibitor activity. *Hum Reprod* 29, 2123-2135.

446 Terriou, P., Hans, E., Giorgetti, C., Spach, J.L., Salzmänn, J., Urrutia, V., and Roulier, R. (2000). Pentoxifylline  
447 Initiates Motility in Spontaneously Immotile Epididymal and Testicular Spermatozoa and Allows Normal  
448 Fertilization, Pregnancy, and Birth After Intracytoplasmic Sperm Injection. *Journal of Assisted Reproduction*  
449 *and Genetics* 17, 194-199.

450 Tesarik, J., Mendoza, C., and Carreras, A. (1992). Effects of phosphodiesterase inhibitors caffeine and  
451 pentoxifylline on spontaneous and stimulus-induced acrosome reactions in human sperm. *Fertil Steril* 58,  
452 1185-1190.

453 Torres-Flores, V., Hernandez-Rueda, Y.L., Neri-Vidaurre, Pdel, C., Jimenez-Trejo, F., Calderon-Salinas, V.,  
454 Molina-Guarneros, J.A., and Gonzalez-Martinez, M.T. (2008). Activation of protein kinase A stimulates the  
455 progesterone-induced calcium influx in human sperm exposed to the phosphodiesterase inhibitor  
456 papaverine. *J Androl* 29, 549-557.

457 Tournaye, H., Janssens, R., Verheyen, G., Camus, M., Devroey, P., and Van Steirteghem, A. (1994). An  
458 indiscriminate use of pentoxifylline does not improve in-vitro fertilization in poor fertilizers. Hum Reprod 9,  
459 1289-1292.

460

461

462

**Table 1** – Summary of screened libraries

| Library                    | No. of compounds | No. of increaser hits | Hit cut-off <sup>2)</sup> | % Hit rate |
|----------------------------|------------------|-----------------------|---------------------------|------------|
| ReFRAME                    | ~13,000          | 48                    | 20-40 % <sup>1)</sup>     | 0.3        |
| Prestwick Chemical Library | 1,280            | 4                     | 20 %                      | 0.3        |
| Tocriscreen Plus           | 1,280            | 24                    | 20 %                      | 1.9        |
| LOPAC                      | 1,280            | 20                    | 20 %                      | 1.6        |
| MMV Pathogenbox            | 400              | 8                     | 40 %                      | 2          |
| CLOUD                      | 263              | 3                     | 20 %                      | 1.1        |
| <b>Total</b>               | <b>17,503</b>    | <b>107</b>            | <b>-</b>                  | <b>1.2</b> |

463 <sup>1)</sup> max. 1 % resupply <sup>2)</sup> increase relative to DMSO control

464

**Table 2** – Most potent increasing compounds

| Compound                 | EC <sub>x</sub> [μM] <sup>1)</sup> | [% of control] | Target Action               |
|--------------------------|------------------------------------|----------------|-----------------------------|
| TAK-063                  | 0.04                               | 145            | Phosphodiesterase Inhibitor |
| RFM-012-216-7            | 0.14                               | 128            | Unknown                     |
| GW 843682X               | 0.17                               | 192            | Protein Kinase Inhibitor    |
| Torin2                   | 0.22                               | 196            | Protein Inhibitor           |
| Linsitinib               | 0.24                               | 191            | Receptor Inhibitor          |
| Tolafentrine             | 0.26                               | 153            | Phosphodiesterase Inhibitor |
| Epetirimod               | 0.32                               | 166            | Unknown                     |
| E6005                    | 0.33                               | 151            | Phosphodiesterase Inhibitor |
| GABAα2/α3 agonists       | 0.35                               | 138            | Receptor Agonist            |
| JNJ-42396302             | 0.39                               | 158            | Phosphodiesterase Inhibitor |
| NM-702                   | 0.48                               | 152            | Phosphodiesterase Inhibitor |
| RG-7203                  | 0.49                               | 162            | Phosphodiesterase Inhibitor |
| Trequinsin hydrochloride | 0.5                                | 143            | Phosphodiesterase Inhibitor |
| Dextofisopam             | 0.54                               | 143            | Unknown                     |
| Papverine                | 0.55                               | 175            | Phosphodiesterase Inhibitor |
| LY-3023414               | 0.56                               | 140            | Protein Kinase Inhibitor    |
| KF 15832                 | 0.61                               | 143            | Phosphodiesterase Inhibitor |
| STL515575                | 0.62                               | 140            | Unknown                     |
| Carbazeran               | 0.63                               | 146            | Phosphodiesterase Inhibitor |

465 <sup>1)</sup>Half maximal effective concentration

**Table 3 – PDE10A inhibitors**

| Compound     | EC <sub>x</sub><br>[μM] <sup>1)</sup> | [% of control] | PDE<br>class |
|--------------|---------------------------------------|----------------|--------------|
| TAK-063      | 0.04                                  | 145            | PDE10A       |
| JNJ-42396302 | 0.39                                  | 158            | PDE10A       |
| RG-7203      | 0.49                                  | 162            | PDE10A       |
| PF-2545920   | n.d. <sup>2)</sup>                    | 130            | PDE10A       |

<sup>1)</sup> Half maximal effective concentration <sup>2)</sup>EC<sub>x</sub> not determined;

## Figure 1

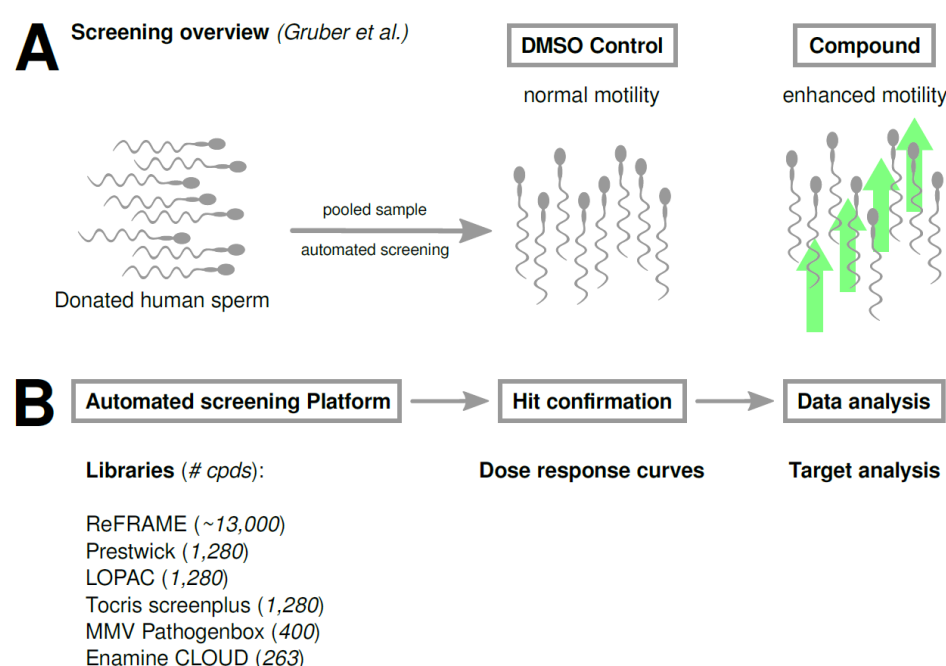

### Figure 1

#### Summary of screening platform and compound screening cascade

**(A)** Motility screening overview as in Gruber et al., 2020. Donated human sperm are pooled and used for automated compound screening to detect compounds which increase sperm motility. DMSO is the vehicle control and the compound label represent a compound which increases motility (reflected by the green arrows).

**(B)** Overview of screened compound libraries and follow-up steps. If a compound is selected as a potential hit in the initial screen, dose response experiments are performed (hit confirmation). Analysis of the compounds with confirmed effects by dose response experiment provided some indication of potential target class (Data Analysis).

# Figure 2

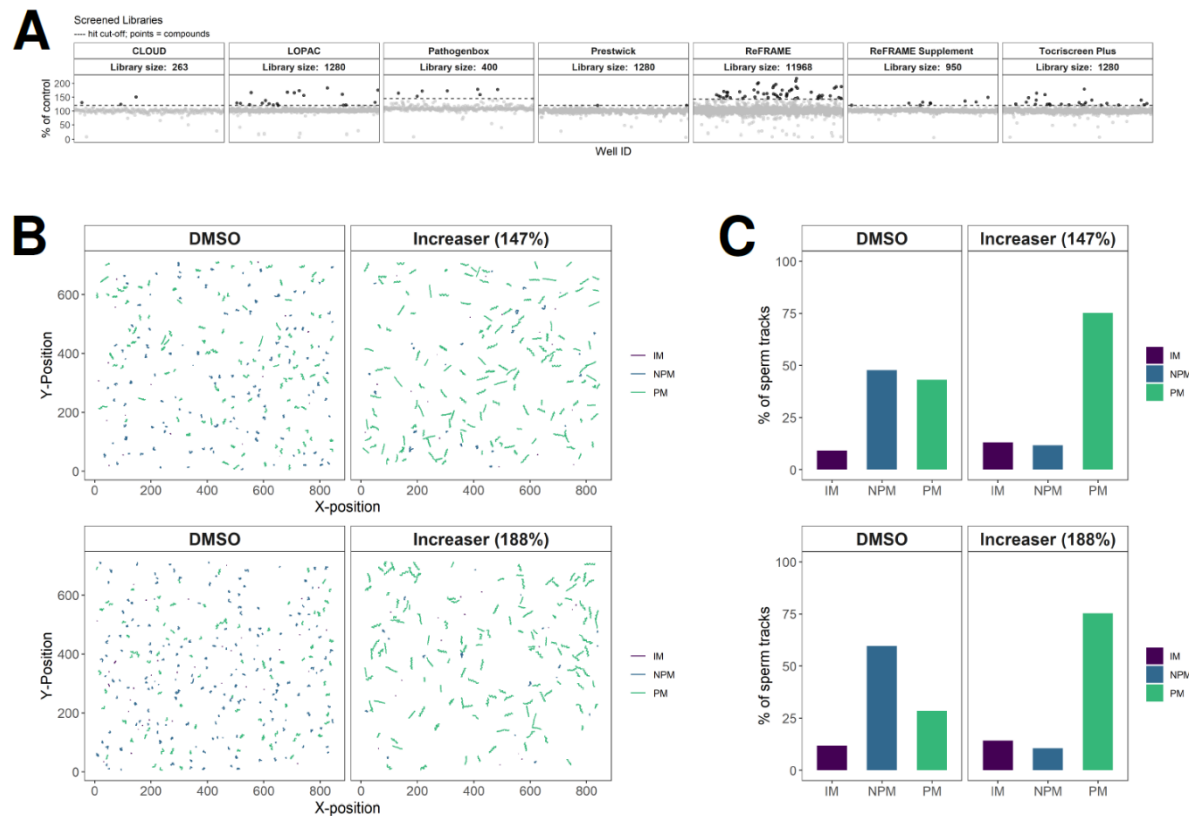

**Figure 2:**

## Primary screening results with examples

**(A)** Primary screening data from all screened libraries. Data is presented as % of control, which is defined as a well median of VCL (including all sperm tracks) relative to a median of VCL of vehicle (DMSO) control wells. Dashed lines represent hit cut-offs for each library. Each dot represents an individual compound and black dots represent hits with motility increase above cut-off. **(B)** Example tracks of spermatozoa exposed to two compounds which increased motility to different degrees; ~147% of control (upper panel) and ~188% of control (lower panel) against a corresponding DMSO control well. Track colour indicates sperm track classification: purple (IM; immotile), blue (NPM; non-progressively motile), green (PM; progressively motile). **(C)** Quantification of classified sperm tracks of (B).

# Figure 3

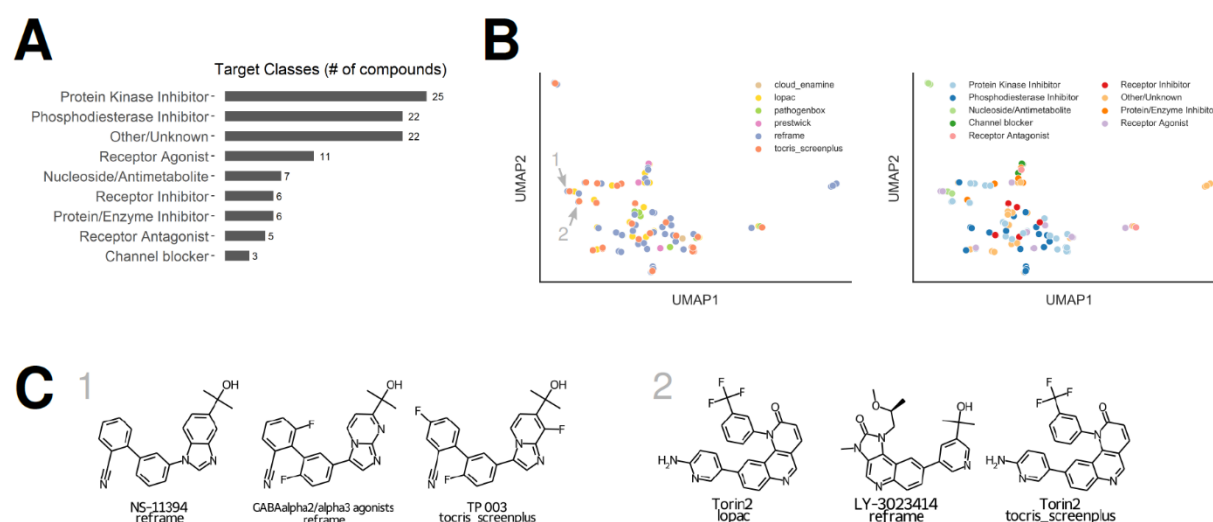

**Figure 3**

## Classification of screening results

**(A)** Summary of the target classes of compounds confirmed by dose response experiments. Target classes were identified according to library annotations. The “other/unknown” category is comprised of compounds with no annotation available from the library vendor or unknown mode of action. **(B)** Chemical space visualization of motility enhancing compounds. Each enhancing compound has been encoded as chemical fingerprint (Morgan Fingerprint) with 2048 bit features. All features have been reduced to two dimensions using UMAP. Color indicates screening library (left panel) or annotated target class (right panel). **(C)** Examples of similar hit structures with names and library information related to GABA signaling (panel 1, also highlighted in B) and mTOR signaling (panel 2, also highlighted in B).

517

# Figure 4

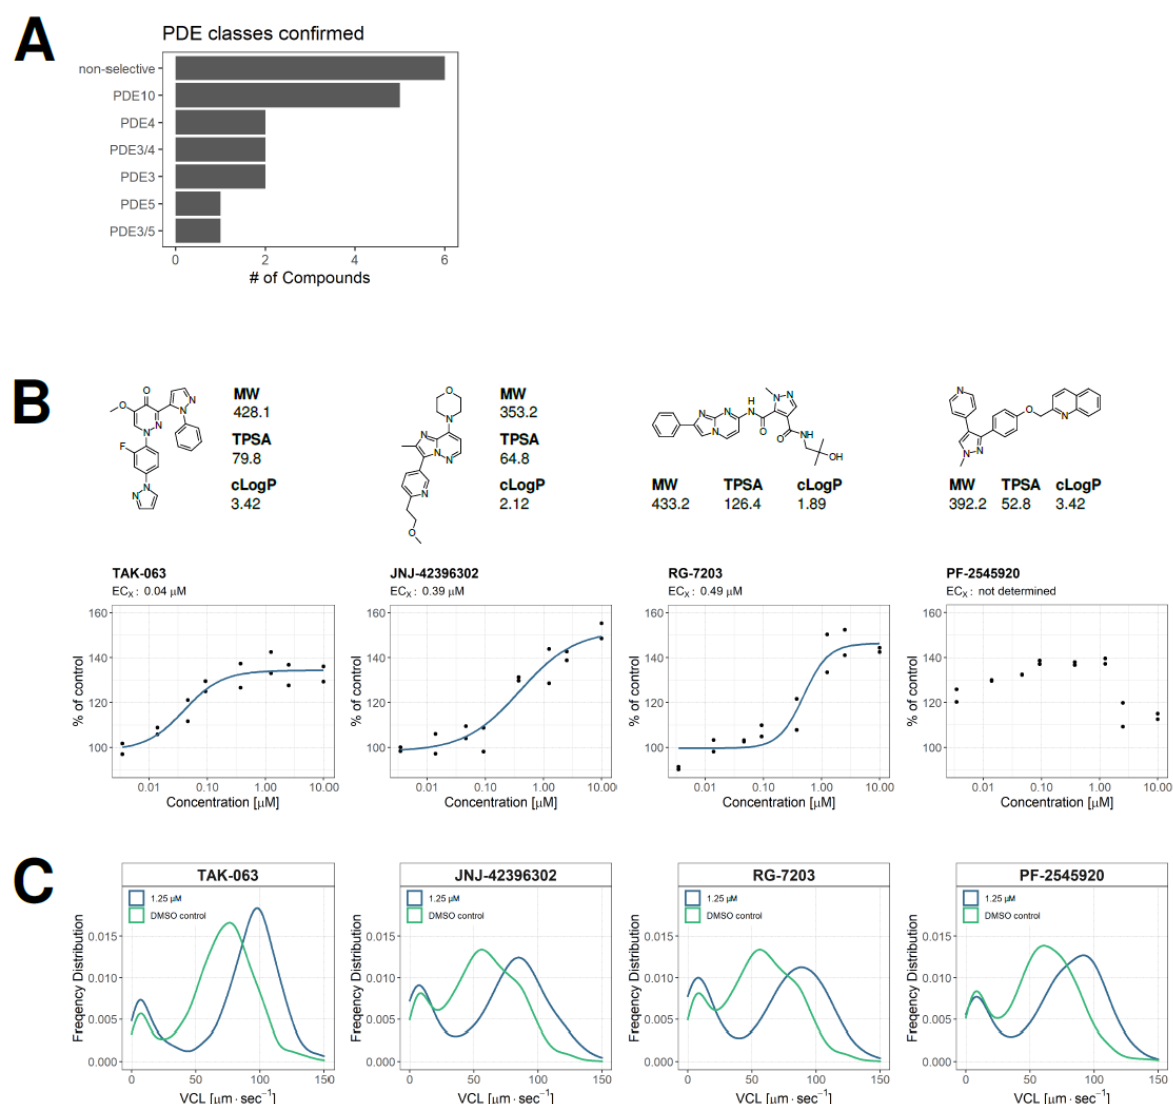

518

519 **Figure 4**

520 **Confirmation of PDE10A inhibitor hits**

521 **(A)** Summary graph of PDE inhibitor classes based on vendor annotation or available information resources  
 522 (ChEMBL, PubChem, DrugBank). **(B)** Dose response curves of 4 PDA10A inhibitors, with structures and  
 523 physico-chemical properties. Blue line: 4 parameter logistic model.  $EC_{50}$ : estimated half-maximum  
 524 concentration. Each dot represents an individual data point,  $n = 2$  for each concentration with data collected  
 525 from two independent dose response experiments utilizing different biological material (i.e. pooled  
 526 spermatozoa samples from different donors in each experiment). Physico-chemical properties are defined  
 527 as: MW: molecular weight; TPSA: topological polar surface area; cLogP: computed Crippen-LogP. **(C)**  
 528 Frequency distributions of sperm VCL of each PDE10A inhibitor shown in (B) at 1.25  $\mu$ M concentration (blue)  
 529 compared to DMSO control wells (green).



530 **Supplementary Table 1**

| Name                              | Library           | EC <sub>50</sub> [μM] | Effect [% of control] | hill_slope | smiles                                                                      |
|-----------------------------------|-------------------|-----------------------|-----------------------|------------|-----------------------------------------------------------------------------|
| TAK-063                           | reframe           | 0.04                  | 145.49                | 1.337      | <chem>COc1cn(nc(-c2ccnn2-c3ccccc3)c1=O)-c4ccc(cc4F)-n5cccn5</chem>          |
| RFM-012-216-7                     | reframe           | 0.14                  | 127.55                | 2.867      | <chem>CCOCCn1nc(C(N)=O)c2nc(nc(Nc3cc(C)ccn3)c12)N(C)CC</chem>               |
| GW 843682X                        | tocris_screenplus | 0.17                  | 192.36                | 1.166      | <chem>COc1c(OC)cc2n(cnc2c1)-c3cc(OCc4cccc4C(F)(F)F)c(s3)C(N)=O</chem>       |
| Torin2                            | lopac             | 0.2                   | 200.9                 | 1.507      | <chem>Nc1ncc(c1)-c2ccc3ncc4c(n(c(=O)cc4)-c5ccc(cc5)C(F)(F)F)c3c2</chem>     |
| Linsitinib                        | pathogenbox       | 0.24                  | 190.95                | 1.596      | <chem>C[C@@]1(O)[C@H](C1)c2nc(-c3ccc4ccc(nc4c3)-c5ccccc5)c6c(N)ncn26</chem> |
| Torin 2                           | tocris_screenplus | 0.24                  | 190.35                | 1.309      | <chem>Nc1ccc(cn1)-c2ccc3ncc4c(n(c(=O)cc4)-c5ccccc5)C(F)(F)F)c3c2</chem>     |
| Tolafentrine                      | reframe           | 0.26                  | 152.77                | 1.061      | <chem>COc1cc2C3CN(C)CCC3N=C(c4ccc(NS(=O)(=O)c5ccc(C)cc5)cc4)c2cc1OC</chem>  |
| Epetirimod esilate                | reframe           | 0.32                  | 165.97                | 0.804      | <chem>CC(C)Cn1cnc2c(N)nc3ccncc3c12</chem>                                   |
| E6005                             | reframe           | 0.33                  | 150.66                | 1.258      | <chem>CNc1nc(-c2cccc(NC(=O)c3ccc(cc3)C(=O)OC)c2)c4cc(OC)c(OC)cc4n1</chem>   |
| GABAα2/α3 agonists                | reframe           | 0.35                  | 137.8                 | 0.732      | <chem>CC(C)(O)c1ccn2c(cnc2n1)-c3ccc(F)c(c3)-c4c(F)cccc4C#N</chem>           |
| JNJ-42396302                      | reframe           | 0.39                  | 158.14                | 0.917      | <chem>COCCc1ccc(cn1)-c2c(C)nc3c(ccnn23)N4CCOCC4</chem>                      |
| parogrelil hydrochloride          | reframe           | 0.48                  | 152.11                | 2.142      | <chem>Clc1ccc(CCCOC2n[nH]c(=O)c(Br)C2NCC3ccncc3)cc1</chem>                  |
| RG-7203                           | reframe           | 0.49                  | 162.18                | 2.037      | <chem>Cn1ncc(C(=O)NCC(C)(C)O)c1C(=O)Nc2ccn3cc(nc3n2)-c4ccccc4</chem>        |
| TREQUINSIN                        | reframe           | 0.5                   | 142.72                | 1.4        | <chem>COc1cc2CCn3c(cc(=Nc4c(C)cc(C)cc4C)n(C)c3=O)-c2cc1OC</chem>            |
| dextofisopam                      | reframe           | 0.54                  | 142.76                | 0.826      | <chem>CCC1=C(C)NN=C(c2ccc(OC)c(OC)c2)c3cc(OC)c(OC)cc13</chem>               |
| Papaverine hydrochloride          | lopac             | 0.55                  | 174.79                | 1.605      | <chem>Cl.COC1ccc(Cc2nccc3c2cc(OC)c(OC)c3)cc1OC</chem>                       |
| LY-3023414                        | reframe           | 0.56                  | 139.91                | 4.015      | <chem>CO[C@@H](C)Cn1c2c(cnc3ccc(cc23)-c4cncc(c4)C(C)(O)O)n(C)c1=O</chem>    |
| KF 15832                          | reframe           | 0.61                  | 142.98                | 2.034      | <chem>CC1CC(=O)NN=C1c2ccc3c(NCc4cccc4)ncnc3c2</chem>                        |
| RFM-000-456-8                     | reframe           | 0.62                  | 139.9                 | 0.854      | <chem>COc1cc2CCn3c(cc(NCC(C)C)nc3=O)-c2cc1OC</chem>                         |
| CARBAZERAN                        | reframe           | 0.63                  | 145.96                | 1.461      | <chem>CCNC(=O)OC1CCN(CC1)c2nnc3cc(OC)c(OC)cc23</chem>                       |
| U 90042                           | reframe           | 0.69                  | 138.7                 | 1.019      | <chem>Clc1ccc-2c(c1)C3=NCCN3c4c(ncn24)-c5noc(n5)C6CC6</chem>                |
| Integrity 452641                  | reframe           | 0.77                  | 132.12                | 1.157      | <chem>CCOCCn1nc(CC)c2nc(nc(Nc3cc(C)ccn3)c12)N4CCC(CC4)C(O)=O</chem>         |
| NS-11394                          | reframe           | 0.85                  | 100                   | 4.95       | <chem>CC(C)(O)c1ccc2n(cnc2c1)-c3ccc(cc3)-c4ccccc4C#N</chem>                 |
| Clofarabine                       | cloud_enamine     | 0.92                  | 202.3                 | 1.824      | <chem>Nc1c2ncn(C3OC(CO)C(O)C3F)c2nc(Cl)n1</chem>                            |
| LMP-420                           | reframe           | 0.97                  | 134.43                | 0.7        | <chem>Nc1nc(Cl)c2ncn(CCCCCB(O)O)c2n1</chem>                                 |
| RFM-003-844-8                     | reframe           | 1.01                  | 136.47                | 1.282      | <chem>CCOC(=O)N1CCN(CC1)c2nnc3cc(OC)c(OC)cc23</chem>                        |
| Breiquinar sodium salt hydrate    | reframe           | 1.06                  | 147.29                | 0.87       | <chem>Cc1c(nc2ccc(F)cc2c1C(O)=O)-c3ccc(cc3)-c4ccccc4F</chem>                |
| L 648051                          | reframe           | 1.07                  | 150.46                | 1.321      | <chem>CCCc1c(O)c(ccc1OCCCS(=O)(=O)c2ccc(cc2)C(=O)CCC(O)=O)c(C)=O</chem>     |
| BNC105                            | reframe           | 1.11                  | 139.87                | 2.273      | <chem>COc1ccc2c(C(=O)c3cc(OC)c(OC)c(OC)c3)c(OC)c2c1O</chem>                 |
| clofarabine                       | reframe           | 1.11                  | 162.65                | 1.141      | <chem>Nc1nc(Cl)nc2n(cnc12)C3OC(CO)C(O)C3F</chem>                            |
| Eupatorin                         | lopac             | 1.21                  | 100                   | 2.122      | <chem>COc1c(O)cc(cc1)-c2cc(=O)c3c(O)c(OC)c(OC)cc3o2</chem>                  |
| ETHAVERINE HYDROCHLORIDE          | reframe           | 1.28                  | 154.6                 | 1.799      | <chem>CCOC1ccc(Cc2nccc3cc(OC)c(OC)cc23)cc1OCC</chem>                        |
| MMV026356                         | pathogenbox       | 1.42                  | 182.79                | 1.39       | <chem>CCn1ncc2c(NC3CCOCC3)c(CNC(=O)c4ccnn4)c(C)nc12</chem>                  |
| Trequinsin hydrochloride          | tocris_screenplus | 1.49                  | 202.3                 | 1.069      | <chem>Cl.COC1c(OC)cc-2c(CCN3c(=O)n(C)c(cc23)=Nc4c(C)cc(C)cc4C)c1</chem>     |
| HTH 01-015                        | tocris_screenplus | 1.51                  | 176.72                | 1.629      | <chem>CN1c2cc3ccccc3cc2C(=O)N(C)C4c1nc(Nc5cn(nc5)C6CCNCC6)nc4C</chem>       |
| BAY 61-3606 hydrochloride hydrate | lopac             | 1.58                  | 128.16                | 0.822      | <chem>Cl.COC1ccc(cc1OC)-c2cc3ncc(C)n3c(Nc4ncccc4C(N)=O)n2</chem>            |
| RFM-012-260-1                     | reframe           | 1.63                  | 176.53                | 1.487      | <chem>CCOC1nc(N)c2ncn(C3CCCC3)c2n1</chem>                                   |
| Ethaverine                        | reframe           | 1.68                  | 158.54                | 2.077      | <chem>CCOC1ccc(Cc2nccc3cc(OC)c(OC)cc23)cc1OCC</chem>                        |
| TP 003                            | tocris_screenplus | 1.72                  | 161.92                | 3.117      | <chem>CC(C)(O)c1c(F)c2ncc(n2cc1)-c3ccc(F)c(c3)-c4ccc(F)cc4C#N</chem>        |
| R1487 (Hydrochloride)             | reframe           | 1.97                  | 158.59                | 1.488      | <chem>Cn1c2nc(NC3CCOCC3)ncc2cc(OC4ccc(F)cc4F)c1=O</chem>                    |
| cinapazet                         | reframe           | 2.02                  | 142.75                | 2.685      | <chem>CCOC(=O)CN1CCN(CC1)C(=O)C=Cc2cc(OC)c(OC)c(OC)c2</chem>                |
| RFM-011-703-3                     | reframe           | 2.02                  | 149.53                | 4.425      | <chem>COc1ncccc1-c2cnc(N)c(Nc3cccc4[nH]ccc4c3)n2</chem>                     |
| HTH-01-015                        | lopac             | 2.2                   | 181.96                | 2.208      | <chem>CN1c2c(cc3ccccc3c2)C(=O)N(C)C4c1nc(Nc5cn(nc5)C6CCNCC6)nc4C</chem>     |
| CP466722                          | lopac             | 2.24                  | 186.5                 | 0.774      | <chem>COc1c(OC)cc2c(c1)ncnc2-n3nc(nc3N)-c4ccccc4</chem>                     |
| RFM-012-242-9                     | reframe           | 2.3                   | 161.2                 | 1.625      | <chem>CCOC1nc(N)c2ncn(C3CCCC3)c2n1</chem>                                   |
| Breiquinar sodium salt hydrate    | lopac             | 2.34                  | 190.43                | 1.249      | <chem>[Na+].Cc1c(C([O-])=O)c2c(ccc(F)c2)nc1-c3ccc(cc3)-c4c(F)cccc4</chem>   |

Gruber et al., August 2021

|                           |                   |       |        |       |                                                                           |
|---------------------------|-------------------|-------|--------|-------|---------------------------------------------------------------------------|
| Cladribine                | reframe           | 2.44  | 135.03 | 1.053 | Nc1nc(Cl)nc2n(cnc12)[C@H]3C[C@H](O)[C@@H](CO)O3                           |
| TCS 359                   | tocris_screenplus | 2.53  | 184.72 | 5.737 | COc1ccc(cc1OC)C(=O)Nc2c(C(N)=O)c3c(CCCC3)s2                               |
| MMV688313                 | pathogenbox       | 2.59  | 181.34 | 2.385 | COc1ccc(cc1OC)-c2nnc3ccc(cnc23)-c4cccc(c4)(C)C                            |
| Benzamil hydrochloride    | prestwick         | 2.79  | 142.52 | 6.709 | Cl.NC(NCc1cccc1)=NC(=O)c2nc(Cl)c(N)nc2N                                   |
| Clofarabine               | tocris_screenplus | 2.89  | 195.96 | 2.426 | Nc1nc(Cl)nc2c1ncn2C3OC(CO)C(O)C3F                                         |
| LDN-214117                | lopac             | 2.94  | 181.24 | 2.168 | COc1cc(cc(OC)c1OC)-c2cc(cnc2C)-c3ccc(cc3)N4CNCC4                          |
| RFM-012-252-1             | reframe           | 2.94  | 166.11 | 1.085 | CCCOc1nc(N)c2ncn(C3CCCC3)c2n1                                             |
| PF 573228                 | tocris_screenplus | 2.95  | 145.04 | 1.837 | CS(=O)(=O)c1cc(CNc2c(cnc(Nc3cc4c(NC(=O)CC4)cc3)n2)C(F)(F)F)ccc1           |
| AZD6738                   | reframe           | 3.09  | 151.37 | 0.853 | C[C@@H]1COCCN1c2cc(nc(n2)-c3ccnc4[nH]ccc34)C5(CC5)[S@](C)(=N)=O           |
| RFM-012-176-6             | reframe           | 3.19  | 133.2  | 3.87  | COc1cc2nc(nc(N)c2cc1OC)N3CCNCC3                                           |
| TWS 119                   | tocris_screenplus | 3.19  | 146.05 | 2.268 | OC(=O)C(F)(F)F.OC(=O)C(F)(F)F.Nc1cc(ccc1)-c2cc3c(Oc4cc(O)ccc4)ncnc3[nH]2  |
| SID 3712249               | lopac             | 3.33  | 168.72 | 1.466 | Nc1nc(cc2c(C#N)c(nc(N)c12)N3CCCC3)N4CCCC4                                 |
| XMD 8-92                  | tocris_screenplus | 3.44  | 179.16 | 1.387 | CCOC1c(Nc2ncc3N(C)C(=O)c4c(ccc4)N(C)c3n2)ccc(c1)N5CCCC(O)CC5              |
| CGS-15943                 | lopac             | 3.46  | 181.51 | 1.006 | Nc1nc2ccc(Cl)cc2c3nc(nnn13)-c4ccco4                                       |
| Amiodarone hydrochloride  | lopac             | 3.53  | 150.06 | 3.668 | Cl.CCCCc1c(C(=O)c2cc(l)c(OCCN(CC)CC)c(l)c2)c3cccc3o1                      |
| Imatinib                  | cloud_enamine     | 3.56  | 143.52 | 2.284 | CN1CCN(Cc2ccc(cc2)C(=O)Nc3cc(Nc4nc(ccn4)-c5cnccc5)c(C)cc3)CC1             |
| Dipyridamole              | tocris_screenplus | 3.57  | 154.09 | 2.629 | OCCN(CCO)c1nc(N2CCCC2)c3nc(nc(N4CCCC4)c3n1)N(CCO)CCO                      |
| PJ 34 hydrochloride       | tocris_screenplus | 3.62  | 156.5  | 1.788 | Cl.CN(C)CC(=O)Nc1cc2c([nH]c(=O)c3cccc23)cc1                               |
| MMV687170                 | pathogenbox       | 3.91  | 186.28 | 1.375 | COc1ccc(Cn2cnc3c(nc(Cl)nc23)-c4ccco4)cc1                                  |
| Trimebutine               | prestwick         | 4.19  | 168.02 | 1.684 | CCC(COC(=O)c1cc(OC)c(OC)c(OC)c1)(N(C)C)c2cccc2                            |
| KRN633                    | lopac             | 4.83  | 161.33 | 1.203 | CCCN(C(=O)Nc1c(Cl)cc(Oc2nnc3cc(OC)c(OC)c23)cc1                            |
| Apadoline                 | reframe           | 4.86  | 133.17 | 1.853 | CCCN(C(=O)c1ccc2Sc3cccc3N(C)C)CN4CCCC4)c2c1                               |
| Tracazolate hydrochloride | prestwick         | 5.04  | 181.41 | 0.875 | Cl.CCCCNc1c2cnn(CC)c2nc(C)c1C(=O)OCC                                      |
| Piperlongumine            | lopac             | 5.07  | 178.68 | 1.079 | COc1cc(C=CC(=O)N2CCC=CC2=O)cc(OC)c1OC                                     |
| WHI-P 154                 | tocris_screenplus | 5.11  | 155.98 | 1.063 | COc1c(OC)cc2c(Nc3cc(Br)c(O)cc3)ncnc2c1                                    |
| K 02288                   | tocris_screenplus | 5.13  | 152.07 | 1.182 | COc1cc(cc(OC)c1OC)-c2cc(cnc2N)-c3cccc(O)c3                                |
| MMV690028                 | pathogenbox       | 5.21  | 168.29 | 1.48  | COc1c(OCCCCOc2ccc(-c3n[nH]nn3)cc2)cc(C4=NN(C5CCCCC5)C(C4(C)C)=O)cc1       |
| MMV023985                 | pathogenbox       | 6.04  | 170.51 | 1.479 | COc1ccc(cc1OC)-c2nnc3ccc(nnn23)N4CCCC4                                    |
| MMV688283                 | pathogenbox       | 6.59  | 154.53 | 1.56  | CN1CCN(CC1)S(=O)(=O)c2ccc(cc2)-c3ccc4c(Nc5ncc(Cl)cn5)ccnc4c3              |
| UK 14304                  | lopac             | 6.83  | 142.96 | 1.469 | Brc1c(NC2=NCCN2)ccc3c1ncn3                                                |
| DC_AC50                   | lopac             | 7.68  | 134.82 | 1.164 | Nc1c(sc2nc3c(CCC3)cc12)C(=O)Nc4c(Br)cc(F)cc4F                             |
| P-218                     | reframe           | 8.95  | 127.52 | 1.289 | CCc1nc(N)nc(N)c1OCCCOc2cccc2CC(O)=O                                       |
| Linsitinib                | reframe           | 9.21  | 133.69 | 7.118 | C[C@@]1(O)C[C@@H](C1)c2nc(-c3ccc4ccc(nc4c3)-c5cccc5)c6c(N)ncn26           |
| RFM-012-209-8             | reframe           | 13.46 | 147.78 | 1.034 | COc1nc(N)c2ncn(C3CCCC3)c2n1                                               |
| Cladribine                | prestwick         | 13.63 | 172.22 | 0.94  | Nc1nc(Cl)nc2c1ncn2C3CC(CO)C(CO)O3                                         |
| ACT-132577                | reframe           | 14.29 | 131.14 | 0.611 | NS(=O)(=O)Nc1ncnc(OCCOc2ncc(Br)cn2)c1-c3ccc(Br)cc3                        |
| SB 218078                 | tocris_screenplus | 16.09 | 158.74 | 2.519 | O=C1NC(=O)c2c1c3c4n(C5CCC(O5)n6c7c(ccc7)c2c46)c8cccc38                    |
| LRRK2-IN-1                | tocris_screenplus | 17.02 | 182.46 | 0.869 | COc1c(Nc2ncc3N(C)C(=O)c4c(ccc4)N(C)c3n2)ccc(c1)C(=O)N5CCC(CC5)N6CCN(C)CC6 |
| Dipyridamole              | cloud_enamine     | 18.08 | 162.29 | 0.876 | OCCN(CCO)c1nc2c(nc(n2N3CCCC3)N(CCO)CCO)c(n1)N4CCCC4                       |
| Ibudilast                 | tocris_screenplus | 18.69 | 167.28 | 1.282 | CC(C)C(=O)c1c2ccccn2nc1C(C)C                                              |
| FPL-59257                 | reframe           | 19.03 | 159.62 | 0.388 | CCc1c(OCCCOc2ccc3c(oc(CCC(O)=O)cc3=O)c2CCC)ccc(C(C)=O)c1O                 |
| UK 14304                  | tocris_screenplus | 25.84 | 148.3  | 0.894 | Brc1c(NC2=NCCN2)ccc3ncnc13                                                |
| TC Mps1 12                | tocris_screenplus | 35.14 | 154.37 | 0.548 | CC(C)(C)Nc1nc(Nc2ccc(cc2)C(N)=O)cc(N)c1C#N                                |
| SCH 58261                 | lopac             | 35.25 | 147.09 | 0.81  | Nc1nc2c(cnn2CCc3cccc3)c4nc(nnn14)-c5ccco5                                 |
| Benafentrine dimaleate    | reframe           | 42.9  | 140.74 | 0.489 | COc1cc2[C@@H]3CN(C)CC[C@@H]3N=C(c4ccc(NC(C)=O)cc4)c2cc1OC                 |
| LY-294002 hydrochloride   | lopac             | 48.25 | 133.52 | 0.871 | Cl.O=c1cc(oc2c(ccc12)-c3cccc3)N4CCOCC4                                    |
| LUF 5834                  | tocris_screenplus | 63.6  | 166.35 | 0.615 | Nc1nc(SCc2ncc[nH]2)c(C#N)c(-c3ccc(O)cc3)c1C#N                             |
| analog of E-3710          | reframe           | 91.29 | 151.22 | 0.572 | Cc1cnc(CSc2nc3cccc3[nH]2)c(C)c1OCC4COC(C)(C)OC4                           |

Gruber et al., August 2021

|                            |                   |       |        |        |                                                                       |
|----------------------------|-------------------|-------|--------|--------|-----------------------------------------------------------------------|
| Benzamil hydrochloride     | lopac             | 201.7 | 146.67 | 0.995  | Cl.NC(NCc1cccc1)=NC(=O)c2nc(Cl)c(N)nc2N                               |
| Ro 3280                    | tocris_screenplus | 246.6 | 153.97 | 0.989  | COc1c(Nc2ncc3N(C)C(=O)C(F)(F)CN(C4CCCC4)c3n2)ccc(c1)C(=O)NC5CCN(C)CC5 |
| SCH 58261                  | tocris_screenplus | 348.8 | 160.31 | 1.167  | Nc1nc2c(cnn2CCc3cccc3)c4nc(nn14)-c5ccco5                              |
| (R)-DRF053 dihydrochloride | tocris_screenplus | 433.6 | 165.94 | 1.05   | Cl.Cl.CCC(CO)Nc1nc(Nc2cc(ccc2)-c3ncccc3)c4ncn(C(C)C)c4n1              |
| KU 60019                   | tocris_screenplus | 1013  | 163.07 | 0.847  | CC1CN(CC(=O)Nc2cc3c{Sc4c(cccc4C3)-c5cc(=O)cc(o5)N6CCOCC6)cc2)CC(C)O1  |
| Ibudilast                  | lopac             | 1184  | 147.03 | 0.727  | CC(C)C(=O)c1c2cccn2nc1(C)C                                            |
| Copanlisib hydrochloride   | reframe           | 1679  | 100    | 0.819  | COc1c(OCCCN2CCOCC2)ccc3C4=NCCN4C(NC(=O)c5cnc(N)nc5)=Nc13              |
| PD153035 hydrochloride     | lopac             | 1767  | 141.35 | 0.891  | Cl.COc1c(OC)cc2c(Nc3cccc(Br)c3)ncnc2c1                                |
| RFM-012-180-2              | reframe           | 2193  | 138.36 | 0.688  | CCOCCn1nc(C(=O)OC)c2nc(nc(Nc3cc(C)ccn3)c12)N(C)CC                     |
| PF-2545920                 | reframe           | n.d.  | 130.39 | -26.54 | Cn1cc(c(n1)-c2ccc(OCc3ccc4cccc4n3)cc2)-c5ccncc5                       |
| THIMEROSOL                 | reframe           | n.d.  | 206.2  | 0.256  | CC[Hg]Sc1cccc1C([O-])=O                                               |

531

532

533 **Supplementary Table 2**

534

| Name                        | PDE target    | Mode       | Annotation                                                                                                                                                                                                                               | smiles                                                                                          |
|-----------------------------|---------------|------------|------------------------------------------------------------------------------------------------------------------------------------------------------------------------------------------------------------------------------------------|-------------------------------------------------------------------------------------------------|
| CARBAZERAN                  | non-selective | increasing | PDE inhibitor (non-selective)                                                                                                                                                                                                            | <chem>CCNC(=O)OC1CCN(CC1)c2nncc3cc(OC)c(OC)cc23</chem>                                          |
| parogrelil hydrochloride    | non-selective | increasing | PDE inhibitor (non-selective)                                                                                                                                                                                                            | <chem>Clc1ccc(CCCOCc2n[nH]c(=O)c(Br)c2NCC3ccccc3)cc1</chem>                                     |
| ETHAVERINE HYDROCHLORIDE    | non-selective | increasing | PDE inhibitor (non-selective)                                                                                                                                                                                                            | <chem>CCOc1ccc(Cc2nccc3cc(OC)c(OC)cc23)cc1OCC</chem>                                            |
| Ethaverine                  | non-selective | increasing | PDE inhibitor (non-selective)                                                                                                                                                                                                            | <chem>CCOc1ccc(Cc2nccc3cc(OC)c(OC)cc23)cc1OCC</chem>                                            |
| Ibudilast                   | non-selective | increasing | PDE inhibitor (non-selective)                                                                                                                                                                                                            | <chem>CC(C)C(=O)c1c2ccccc2nc1C(C)C</chem>                                                       |
| Papaverine hydrochloride    | non-selective | increasing | Phosphodiesterase inhibitor                                                                                                                                                                                                              | <chem>Cl.COc1ccc(Cc2nccc3c2cc(OC)c(OC)c3)cc1OC</chem>                                           |
| Dipyridamole                | non-selective | increasing | Dipyridamole a non-nitrate coronary vasodilator that also inhibits platelet aggregation is combined with other anticoagulant drugs such as warfarin to prevent thrombosis in patients with valvular or vascular disorders.               | <chem>OCCN(CCO)c1nc2c(nc(nc2N3CCCC3)N(CCO)CCO)c(n1)N4CCCCC4</chem>                              |
| IBMX                        | non-selective | inactive   | PDE inhibitor (non-selective)                                                                                                                                                                                                            | <chem>CC(C)Cn1c(=O)n(C)c(=O)c2[nH]cnc21</chem>                                                  |
| Deltarasin                  | non-selective | inactive   | High affinity PDEdelta-KRAS interaction inhibitor                                                                                                                                                                                        | <chem>Cl.Cl.Cl.c1ccc(Cn2c(-c3ccc(OC(C4CCNCC4)n4c(-c5ccccc5)nc5ccccc54)cc3)nc3ccccc32)cc1</chem> |
| Ro 20-1724                  | non-selective | inactive   | Potent and selective cAMP phosphodiesterase inhibitor                                                                                                                                                                                    | <chem>CCCCOc1cc(CCC2CNC(=O)N2)ccc1OC</chem>                                                     |
| Cilostazol                  | non-selective | inactive   | Specific type III phosphodiesterase (PDE) inhibitor                                                                                                                                                                                      | <chem>O=C1CCc2cc(OC(Cc3nnnn3C3CCCC3)ccc2N1</chem>                                               |
| Caffeine                    | non-selective | inactive   | Phosphodiesterase inhibitor; central stimulant                                                                                                                                                                                           | <chem>Cn1c(=O)c2c(ncn2C)n(C)c1=O</chem>                                                         |
| Anagrelide hydrochloride    | non-selective | inactive   | Anagrelide is a phosphodiesterase inhibitor with antiplatelet activity (IC50 = 36 nM for inhibition of phosphodiesterase-III)                                                                                                            | <chem>Cl.O=C1CN2Cc3c(ccc(Cl)c3Cl)NC2=N1</chem>                                                  |
| Calmidazolium chloride      | non-selective | inactive   | Potent inhibitor of calmodulin activation of phosphodiesterase; strongly inhibits calmodulin-dependent Ca2+-ATPase                                                                                                                       | <chem>Clc1ccc(C(c2ccc(Cl)cc2)[n+](c2ccn(CC(OCc3ccc(Cl)cc3Cl)c3ccc(Cl)c3Cl)c2)cc1.[Cl-]</chem>   |
| 3-Isobutyl-1-methylxanthine | non-selective | inactive   | Potent phosphodiesterase inhibitor; more active than theophylline at adenosine receptors                                                                                                                                                 | <chem>CC(C)Cn1c(=O)n(C)c(=O)c2[nH]cnc21</chem>                                                  |
| Pentoxifylline              | non-selective | inactive   | Inhibits synthesis of tumor necrosis factor alpha (TNF-alpha); phosphodiesterase inhibitor                                                                                                                                               | <chem>CC(=O)CCCCn1c(=O)n(C)c2c(ncn2C)n(C)c1=O</chem>                                            |
| Quercetin dihydrate         | non-selective | inactive   | Mitochondrial ATPase and phosphodiesterase (PDE) inhibitor; inhibits PI3-K activity                                                                                                                                                      | <chem>O=c1c(O)c(-c2ccc(O)c(O)c2)oc2cc(O)cc(O)c12</chem>                                         |
| Theobromine                 | non-selective | inactive   | Weak adenosine receptor antagonist; weak phosphodiesterase inhibitor; diuretic; smooth muscle relaxant                                                                                                                                   | <chem>Cn1cnc2c1c(=O)[nH]c(=O)n2C</chem>                                                         |
| Zaprinast                   | non-selective | inactive   | Selective cGMP-phosphodiesterase type V inhibitor                                                                                                                                                                                        | <chem>CCCOc1cccc1-c1nc(=O)c2nn[nH]c2[nH]1</chem>                                                |
| Furamide dihydrochloride    | non-selective | inactive   | Furamide (DB75) binds to strings of AT base pair sequences in DNA's minor groove Furamide has also been found to inhibit tyrosyl-DNA phosphodiesterase (Tdp1)                                                                            | <chem>Cl.Cl.N=C(N)c1cccc(-c2ccc(-c3ccc(C(=N)N)cc3)o2)cc1</chem>                                 |
| Caffeine                    | non-selective | inactive   | Central nervous system stimulant. Antagonist at A1 and A2A adenosine receptors and inhibitor of cyclic nucleotide phosphodiesterases. Mobilizes calcium from intracellular stores and inhibits benzodiazepine binding to GABA receptors. | <chem>Cn1c(=O)c2c(ncn2C)n(C)c1=O</chem>                                                         |
| Sildenafil                  | non-selective | inactive   | Sildenafil is a vasoactive agent used to treat erectile dysfunction and reduce symptoms in patients with pulmonary arterial hypertension (PAH).                                                                                          | <chem>CCCc1nn(C)c2c(=O)[nH]c(-c3cc(S(=O)(=O)N4CCN(C)CC4)ccc3OCC)nc12</chem>                     |
| Milrinone                   | non-selective | inactive   | Milrinone inhibits erythrocyte phosphodiesterase resulting in an increase in erythrocyte cAMP (Cyclic adenosine monophosphate) activity.                                                                                                 | <chem>Cc1[nH]c(=O)c(C</chem>                                                                    |
| Theophylline                | non-selective | inactive   | Theophylline an xanthine derivative chemically similar to caffeine and theobromine is used to treat asthma and bronchospasm.                                                                                                             | <chem>Cn1c(=O)c2[nH]cnc2n(C)c1=O</chem>                                                         |
| Etofylline                  | non-selective | inactive   | Phosphodiesterases_Enzyme_Antispastic_Cardiovascular                                                                                                                                                                                     | <chem>Cn1c(=O)c2c(ncn2CCO)n(C)c1=O</chem>                                                       |
| Vinpocetine                 | non-selective | inactive   | Phosphodiesterases_Enzyme_CNS Stimulant_Cardiovascular                                                                                                                                                                                   | <chem>CCOC(=O)C1=CC2(CC)CCCN3CCc4c(n1c1cccc41)C32</chem>                                        |
| Diprophylline               | non-selective | inactive   | Phosphodiesterases_Enzyme_Analeptic_Cardiovascular                                                                                                                                                                                       | <chem>Cn1c(=O)c2c(ncn2CC(O)CO)n(C)c1=O</chem>                                                   |

|                          |               |            |                                                                                                 |                                                                                                        |
|--------------------------|---------------|------------|-------------------------------------------------------------------------------------------------|--------------------------------------------------------------------------------------------------------|
| Pentoxifylline           | non-selective | inactive   | Phosphodiesterases_Enzyme_Bronchodilator_Cardiovascular                                         | <chem>CC(=O)CCCCn1c(=O)c2c(ncn2C)n(C)c1=O</chem>                                                       |
| Dipyridamole             | non-selective | inactive   | Phosphodiesterases_Enzyme_Anticoagulant_Cardiovascular                                          | <chem>OCCN(CCO)c1nc(N2CCCCC2)c2nc(N(CCO)CCO)nc(N3CCCCC3)c2n1</chem>                                    |
| Papaverine hydrochloride | non-selective | inactive   | Phosphodiesterases_Enzyme_Antispastic_Cardiovascular                                            | <chem>COc1ccc(Cc2cccc3cc(OC)c(OC)cc23)cc1OC.Cl</chem>                                                  |
| Bucladesine sodium salt  | non-selective | inactive   | Phosphodiesterases_Enzyme_Cardiovascular                                                        | <chem>CCCC(=O)Nc1ncnc2c1ncn2C1OC2OP(=O)([O-])OCC2C1OC(=O)CCC.[Na+]</chem>                              |
| Aminophylline            | non-selective | inactive   | Phosphodiesterases_Enzyme_Bronchodilator_Cardiovascular                                         | <chem>Cn1c(=O)c2[nH]cnc2n(C)c1=O.Cn1c(=O)c2[nH]cnc2n(C)c1=O.NCCN</chem>                                |
| Doxofylline              | non-selective | inactive   | Phosphodiesterases_Enzyme_Bronchodilator_Respiratory                                            | <chem>Cn1c(=O)c2c(ncn2CC2OCCO2)n(C)c1=O</chem>                                                         |
| Amrinone                 | non-selective | inactive   | Phosphodiesterases_Enzyme_Cardiovascular                                                        | <chem>Nc1cc(-c2ccnc2)c[nH]c1=O</chem>                                                                  |
| Theophylline monohydrate | non-selective | inactive   | Phosphodiesterases_Enzyme_Bronchodilator_Cardiovascular                                         | <chem>Cn1c(=O)c2[nH]cnc2n(C)c1=O.O</chem>                                                              |
| Zardaverine              | non-selective | inactive   | Phosphodiesterases_Enzyme_Bronchodilator_Respiratory                                            | <chem>COc1cc(-c2ccc(=O)[nH]n2)ccc1OC(F)F</chem>                                                        |
| Milrinone                | non-selective | inactive   | Phosphodiesterases_Enzyme_Vasodilator_Cardiovascular                                            | <chem>Cc1[nH]c(=O)c(C</chem>                                                                           |
| Anagrelide               | non-selective | inactive   | Phosphodiesterases_Enzyme_Thrombolytic_Hematology                                               | <chem>O=C1CN2Cc3c(ccc(Cl)c3Cl)N=C2N1</chem>                                                            |
| Trapidil                 | non-selective | inactive   | Phosphodiesterases_Enzyme_Vasodilator_Cardiovascular                                            | <chem>CCN(CC)c1cc(C)nc2ncnn12</chem>                                                                   |
| BRL 50481                | PDE7          | inactive   | Selective PDE7 inhibitor                                                                        | <chem>Cc1ccc([N+](=O)[O-])cc1S(=O)(=O)N(C)C</chem>                                                     |
| Integrity 452641         | PDE5          | increasing | PDE5A inhibitor                                                                                 | <chem>CCOCCn1nc(CC)c2nc(nc(Nc3cc(C)ccn3)c12)N4CCC(CC4)C(O)=O</chem>                                    |
| MY-5445                  | PDE5          | inactive   | PDE5 inhibitor                                                                                  | <chem>C=CC1(C)CC(=O)C2(O)C(C)(O1)C(OC(C)=O)C(O)C1(C)C(CCC(O)C)C12C</chem>                              |
| T 0156 hydrochloride     | PDE5          | inactive   | Highly potent selective PDE5 inhibitor                                                          | <chem>COC(=O)c1c(-c2cc(OC)c(OC)c(OC)c2)c2ccnc(OCc3ncccn3)c2c(=O)n1Cc1ccnc(C)c1.Cl</chem>               |
| Sildenafil citrate       | PDE5          | inactive   | Orally active potent PDE5 inhibitor                                                             | <chem>CCCC1nn(C)c2c(=O)nc(-c3cc(S(=O)(=O)N4CCN(C)CC4)ccc3OCC)[nH]c12.O=C(O)CC(O)(CC(=O)O)C(=O)O</chem> |
| Zaprinast                | PDE5          | inactive   | Phosphodiesterase 5_Enzyme_Erectile dysfunction treatment_Cardiovascular                        | <chem>CCCOc1cccc1-c1nc(=O)c2[nH]nnc2[nH]1</chem>                                                       |
| Vardenafil               | PDE5          | inactive   | Phosphodiesterase 5_Enzyme_Erectile dysfunction treatment_Cardiovascular                        | <chem>CCCC1nc(C)c2c(=O)nc(-c3cc(S(=O)(=O)N4CCN(C)CC4)ccc3OCC)[nH]n12</chem>                            |
| Sildenafil               | PDE5          | inactive   | Phosphodiesterase 5_Enzyme_Antihypertensive_Cardiovascular                                      | <chem>CCCC1nn(C)c2c(=O)[nH]c(-c3cc(S(=O)(=O)N4CCN(C)CC4)ccc3OCC)nc12</chem>                            |
| E6005                    | PDE4          | increasing | PDE4 inhibitor                                                                                  | <chem>CNc1nc(-c2cccc(NC(=O)c3ccc(cc3)C(=O)OC)c2)c4cc(OC)c(OC)cc4n1</chem>                              |
| Ibudilast                | PDE4          | increasing | Phosphodiesterase IV (PDE IV) inhibitor                                                         | <chem>CC(C)C(=O)c1c2ccccn2nc1C(C)C</chem>                                                              |
| Ro 20-1724               | PDE4          | inactive   | PDE4 inhibitor                                                                                  | <chem>Nc1ncnc2c1nc(Br)n2C1OC2COP(=O)([O-])OC2C1O.[Na+]</chem>                                          |
| Rolipram                 | PDE4          | inactive   | PDE4 inhibitor                                                                                  | <chem>CCC(=C(c1cccc1)c1ccc(OCCN(C)C)cc1)c1cccc1</chem>                                                 |
| (R)-(-)-Rolipram         | PDE4          | inactive   | PDE4 inhibitor. More active enantiomer of rolipram (Cat. No. 0905)                              | <chem>Cl.O=c1cc(N2CCOCC2)oc2c(-c3cccc3)cccc12</chem>                                                   |
| ICI 63197                | PDE4          | inactive   | PDE4 inhibitor                                                                                  | <chem>CCCN1c(=O)c(C)cn2nc(N)nc12</chem>                                                                |
| YM 976                   | PDE4          | inactive   | PDE4 inhibitor                                                                                  | <chem>CCc1ccc2c(-c3cccc(Cl)c3)nc(=O)n(CC)c2n1</chem>                                                   |
| Irsogladine maleate      | PDE4          | inactive   | PDE4 inhibitor; antiulcer agent                                                                 | <chem>Nc1nc(N)nc(-c2cc(Cl)ccc2Cl)n1.O=C(O)C=CC(=O)O</chem>                                             |
| Piclamilast              | PDE4          | inactive   | Potent and selective PDE4 inhibitor                                                             | <chem>COc1ccc(C(=O)Nc2c(Cl)cncc2Cl)cc1OC1CCCC1</chem>                                                  |
| YM 976                   | PDE4          | inactive   | Phosphodiesterase type IV (PDE4) inhibitor. Exhibits anti-inflammatory activity without emesis. | <chem>CCc1ccc2c(-c3cccc(Cl)c3)nc(=O)n(CC)c2n1</chem>                                                   |
| Rolipram                 | PDE4          | inactive   | Selective cAMP-dependent phosphodiesterase (Type IV) cAMP-dependent inhibitor                   | <chem>COc1ccc(C2CNC(=O)C2)cc1OC1CCCC1</chem>                                                           |
| Flavoxate hydrochloride  | PDE4          | inactive   | Phosphodiesterase 4_Enzyme_Antispastic_Metabolism                                               | <chem>Cc1c(-c2cccc2)oc2c(C(=O)OCCN3CCCCC3)cccc2c1=O.Cl</chem>                                          |

|                                             |        |            |                                                                            |                                                                            |
|---------------------------------------------|--------|------------|----------------------------------------------------------------------------|----------------------------------------------------------------------------|
| Irsogladine maleate                         | PDE4   | inactive   | Phosphodiesterase 4_Enzyme_Antiulcer_Metabolism                            | <chem>Nc1nc(N)nc(-c2cc(Cl)ccc2Cl)n1.O=C(O)C=CC(=O)O</chem>                 |
| Ibudilast                                   | PDE4   | inactive   | Phosphodiesterase 4_Enzyme_Anti-inflammatory_Metabolism                    | <chem>CC(C)C(=O)c1c(C(C)C)nn2ccccc12</chem>                                |
| KF 15832                                    | PDE3/5 | increasing | PDE3/5 inhibitor                                                           | <chem>CC1CC(=O)NN=C1c2ccc3c(NCc4ccccc4)ncnc3c2</chem>                      |
| Benafentrine dimaleate                      | PDE3/4 | increasing | PDE3/4 inhibitor                                                           | <chem>COC1cc2[C@@H]3CN(C)CC[C@@H]3N=C(c4ccc(NC(C)=O)cc4)c2cc1OC</chem>     |
| Tolafentrine                                | PDE3/4 | increasing | PDE3/4 inhibitor                                                           | <chem>COC1cc2C3CN(C)CCC3N=C(c4ccc(NS(=O)(=O)c5ccc(C)cc5)cc4)c2cc1OC</chem> |
| Zardaverine                                 | PDE3/4 | inactive   | PDE3/4 inhibitor                                                           | <chem>NC(C(=O)O)C(O)c1ccc(O)c(O)c1</chem>                                  |
| TREQUINSIN                                  | PDE3   | increasing | Highly potent PDE3 inhibitor                                               | <chem>COC1cc2CCn3c(cc(=Nc4c(C)cc(C)cc4C)n(C)c3=O)-c2cc1OC</chem>           |
| Trequinsin hydrochloride                    | PDE3   | increasing | Extremely potent inhibitor of PDE3                                         | <chem>Cl.COc1c(OC)cc-2c(CCN3c(=O)n(C)c(cc23)=Nc4c(C)cc(C)cc4C)c1</chem>    |
| Cilostamide                                 | PDE3   | inactive   | PDE3 inhibitor                                                             | <chem>COC(=O)C1=COC(C)C(CO)=CCC12</chem>                                   |
| Siguazodan                                  | PDE3   | inactive   | PDE3 inhibitor                                                             | <chem>CN(C)CCCN1c2ccccc2Sc2ccccc21.Cl</chem>                               |
| Cilostazol                                  | PDE3   | inactive   | PDE3A inhibitor. Also adenosine uptake inhibitor                           | <chem>O=C1CCc2cc(OCCCCc3nnnn3C3CCCC3)ccc2N1</chem>                         |
| Cilostamide                                 | PDE3   | inactive   | cGMP-inhibited phosphodiesterase inhibitor (PDE III)                       | <chem>CN(C(=O)CCCOc1ccc2[nH]c(=O)ccc2c1)C1CCCCC1</chem>                    |
| Enoximone                                   | PDE3   | inactive   | Selective phosphodiesterase III (PDE III) inhibitor                        | <chem>CSc1ccc(C(=O)c2[nH]c(=O)[nH]c2C)cc1</chem>                           |
| Milrinone                                   | PDE3   | inactive   | Phosphodiesterase III inhibitor                                            | <chem>Cc1[nH]c(=O)c(C</chem>                                               |
| Olprinone hydrochloride                     | PDE3   | inactive   | Selective phosphodiesterase 3 (PDE3) inhibitor.                            | <chem>Cc1[nH]c(=O)c(C</chem>                                               |
| Cilostazol                                  | PDE3   | inactive   | Phosphodiesterase 3_Enzyme_Anticoagulant_Hematology                        | <chem>O=C1CCc2cc(OCCCCc3nnnn3C3CCCC3)ccc2N1</chem>                         |
| Sulmazole                                   | PDE3   | inactive   | Phosphodiesterase 3_Enzyme_Cardiotonic_Cardiovascular                      | <chem>COC1cc(S(C)=O)ccc1-c1nc2ncccc2[nH]1</chem>                           |
| Imazodan                                    | PDE2   | inactive   | Selective phosphodiesterase II (PDEII) inhibitor                           | <chem>O=C1CCC(c2ccc(-n3ccnc3)cc2)=NN1</chem>                               |
| PF-2545920                                  | PDE10  | increasing | Potent and selective PDE10A inhibitor                                      | <chem>Cn1cc(c(n1)-c2ccc(OCc3ccc4ccccc4n3)cc2)-c5ccncc5</chem>              |
| TAK-063                                     | PDE10  | increasing | Selective inhibitor of PDE10A                                              | <chem>COC1cn(nc(-c2ccnn2-c3ccccc3)c1=O)-c4ccc(cc4F)-n5cccn5</chem>         |
| JNJ-42396302                                | PDE10  | increasing | PDE10A inhibitor                                                           | <chem>COCc1ccc(en1)-c2c(C)nc3c(ccnn23)N4CCOCC4</chem>                      |
| RG-7203                                     | PDE10  | increasing | PDE10A inhibitor                                                           | <chem>Cn1ncc(C(=O)NCC(C)(C)O)c1C(=O)Nc2ccn3cc(nc3n2)-c4ccccc4</chem>       |
| 8-Methoxymethyl-3-isobutyl-1-methylxanthine | PDE1   | inactive   | Selective inhibitor of Ca2+-calmodulin-dependent phosphodiesterase (PDE I) | <chem>COCc1nc2c(=O)n(C)c(=O)n(CC(C)C)c2[nH]1</chem>                        |
| Vinpocetine                                 | PDE1   | inactive   | Ca2+ /calmodulin-dependent phosphodiesterase1 (PDE1) inhibitor.            | <chem>CCOC(=O)C1=CC2(CC)CCCN3CCc4c(n1c1ccccc41)C32</chem>                  |
